# Supplementary figures and images for: Paliperidone Inhibits Glioblastoma Growth in Mouse Brain Tumor Model and Reduces PD-L1 Expression
Source: MDPI journal article supplement (doi:10.3390/cancers13174357), 2021-08-28

Figure 4 CD

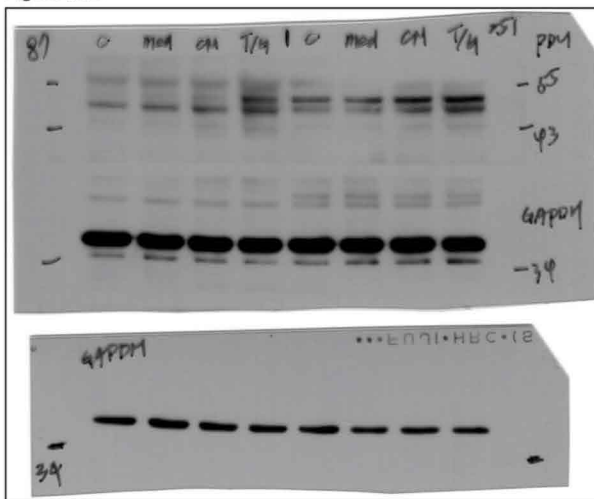

Figure 6A

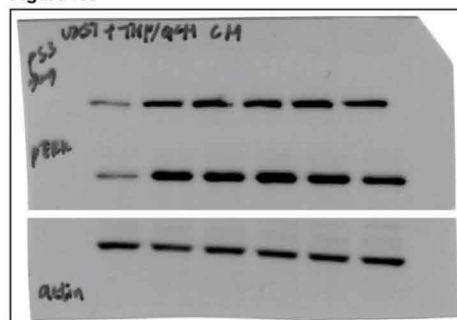

Figure 6B

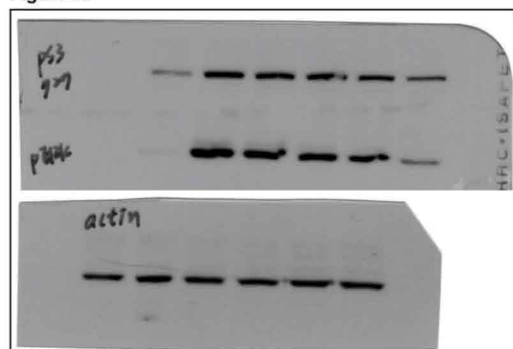

Figure 6C

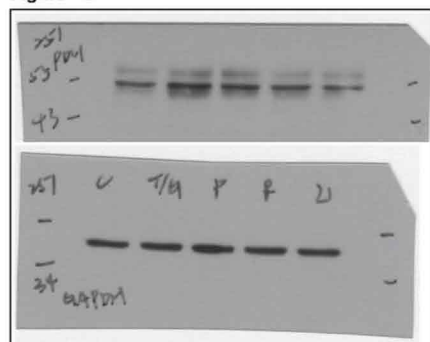

Figure 6D

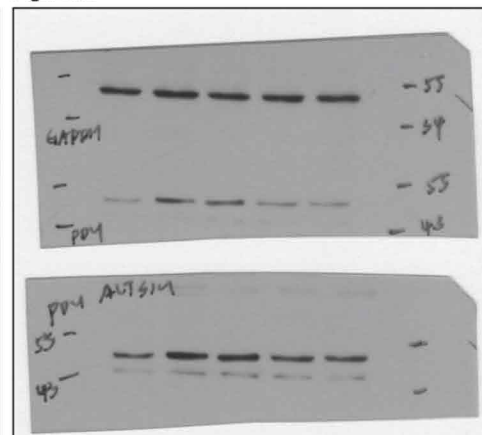

Figure 6E

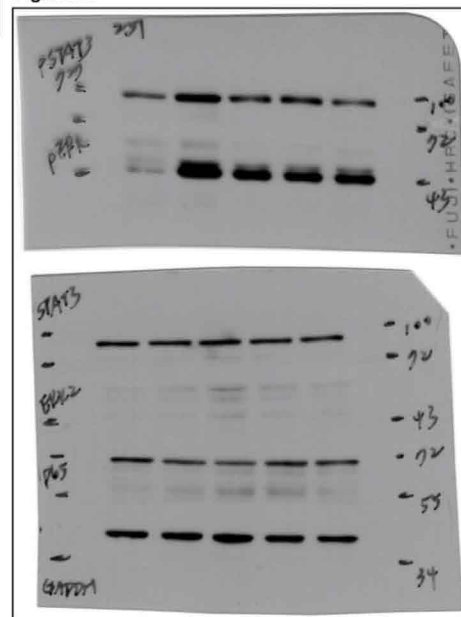

Figure 6F

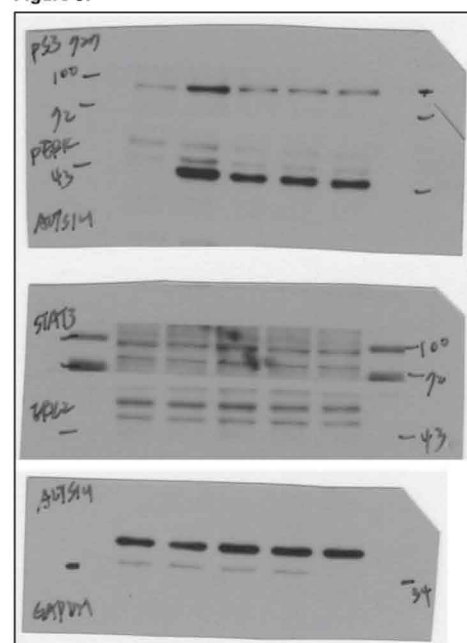

**Figure 6G**

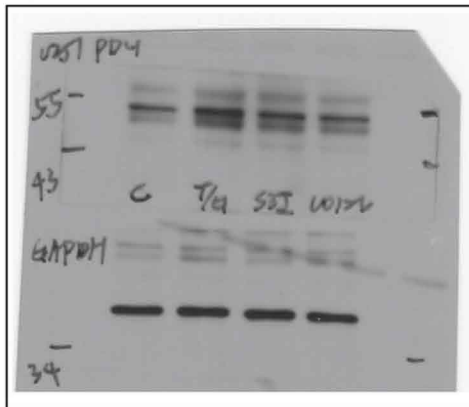

**Figure 3B**

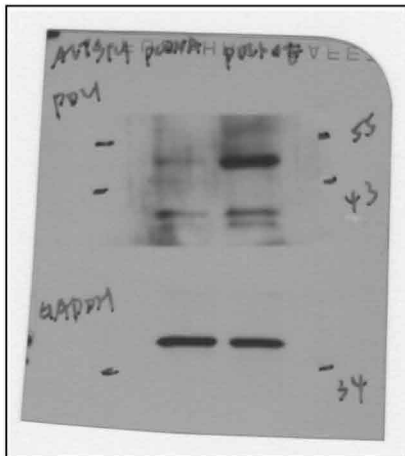

**Figure 6H**

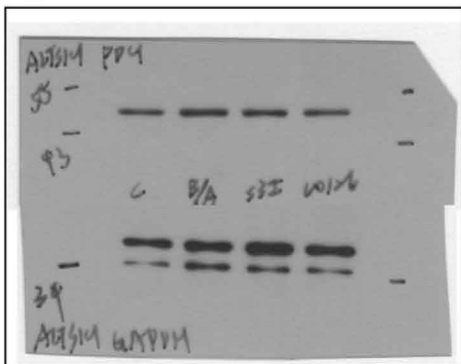

Supplement: s1 [file s1]
